# Supplementary material
Source: MDPI journal article supplement (https://www.mdpi.com/2073-8994/13/11/2040)
Supplement: s1 [file s1 › symmetry-1370120-supplementary.pdf]

Table S1. Number of publications by journal.

| Journals                                                                     | # | Journals                                                      | # |
|------------------------------------------------------------------------------|---|---------------------------------------------------------------|---|
| Conferences                                                                  | 7 | Nature Methods                                                | 1 |
| Neurocomputing                                                               | 6 | Neural Computation                                            | 1 |
| IEEE Access                                                                  | 6 | Accident Analysis & Prevention                                | 1 |
| IEEE transactions on pattern analysis and machine intelligence               | 5 | IEEE/ACM Transactions on Audio Speech and Language Processing | 1 |
| IEEE Transactions on Neural Networks and Learning Systems                    | 5 | Journal of Management Information Systems                     | 1 |
| Information Sciences                                                         | 3 | Wireless Personal Communications                              | 1 |
| Neural Networks                                                              | 3 | Machine Learning & Knowledge Extraction                       | 1 |
| IEEE Transactions on Cybernetics                                             | 3 | Symmetry                                                      | 1 |
| IEEE Robotics and Automation Letters                                         | 2 | Magnetic Resonance in Medicine                                | 1 |
| Pattern Recognition                                                          | 2 | IEEE Communications Letters                                   | 1 |
| Nature                                                                       | 2 | Additive Manufacturing                                        | 1 |
| Medical Image Analysis                                                       | 2 | Journal of Network and Computer Applications                  | 1 |
| Plos one                                                                     | 2 | Information and Software Technology                           | 1 |
| Frontiers in Neuroscience                                                    | 2 | IEEE Network                                                  | 1 |
| Technological Forecasting and Social Change                                  | 2 | IEEE Transactions on Industrial Informatics                   | 1 |
| Neural Computing and Applications                                            | 2 | European Physical Journal C                                   | 1 |
| Energy and Buildings                                                         | 2 | Quantitative Finance                                          | 1 |
| Applied Energy                                                               | 2 | Autonomous Robots                                             | 1 |
| Expert Systems with Applications                                             | 2 | Computer-Aided Civil and Infrastructure Engineering           | 1 |
| IEEE Transactions on Image Processing                                        | 2 | Remote Sensing                                                | 1 |
| International Journal of Computer Vision                                     | 1 | IEEE Transactions on Circuits and Systems I: Regular Papers   | 1 |
| Frontiers of Computer Science                                                | 1 | Applied and Computational Harmonic Analysis                   | 1 |
| Energies                                                                     | 1 | Journal of Educational Computing Research                     | 1 |
| Information Fusion                                                           | 1 | Computers & Industrial Engineering                            | 1 |
| Mechanical Systems and Signal Processing                                     | 1 | Applied Soft Computing Journal                                | 1 |
| Technologies                                                                 | 1 | Artificial Intelligence                                       | 1 |
| Archive of Applied Mechanics                                                 | 1 | IEEE Transactions on Intelligent Transportation Systems       | 1 |
| Information Fusion                                                           | 1 | Computational Economics                                       | 1 |
| Machine Learning                                                             | 1 | Journal of Computational Physics                              | 1 |
| Signal Processing                                                            | 1 | Applied Intelligence                                          | 1 |
| ACM Computing Surveys                                                        | 1 | Journal of Intelligent Manufacturing                          | 1 |
| Scientific Reports                                                           | 1 | Renewable and Sustainable Energy Reviews                      | 1 |
| IEEE Intelligent Systems                                                     | 1 | Sensors                                                       | 1 |
| IEEE Transactions on Signal Processing                                       | 1 | Knowledge-Based Systems                                       | 1 |
| NeuroImage                                                                   | 1 | ACM Transactions on Intelligent Systems and Technology        | 1 |
| Mechanical Systems and Signal Processing                                     | 1 | IEEE Transactions on Industrial Electronics                   | 1 |
| Behavior Therapy                                                             | 1 | Science                                                       | 1 |
| Journal of the Royal Statistical Society: Series B (Statistical Methodology) | 1 | Science Advances                                              | 1 |
| The Plant Phenome Journal                                                    | 1 | Transportation Research Part C: Emerging Technologies         | 1 |

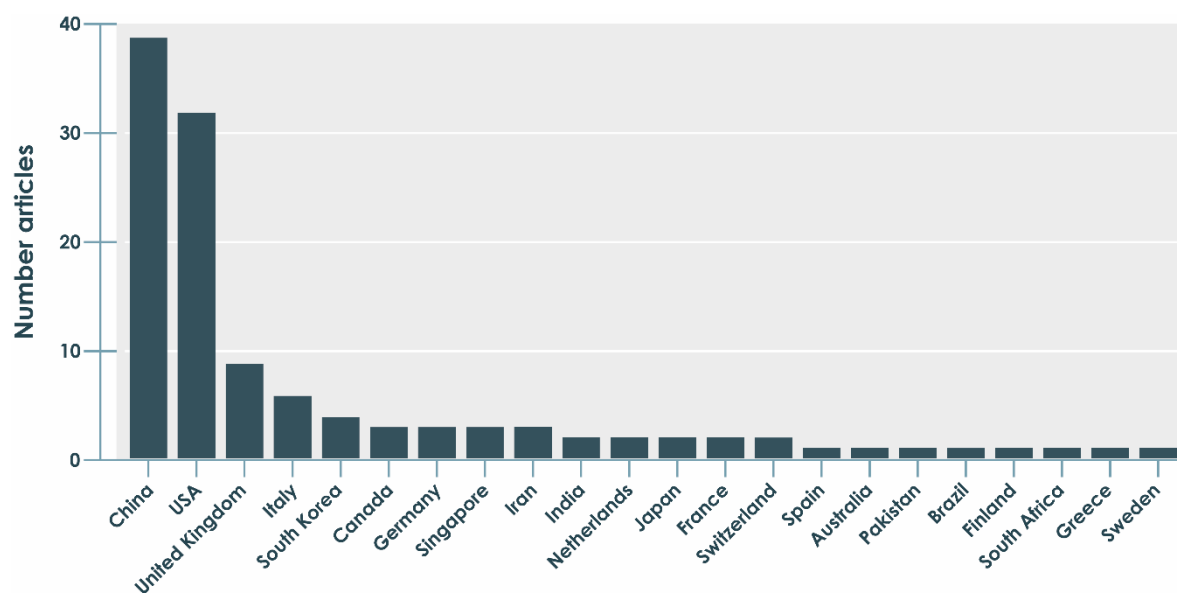

Figure S1. Number of publications by country where the study is carried out (2017-2011).

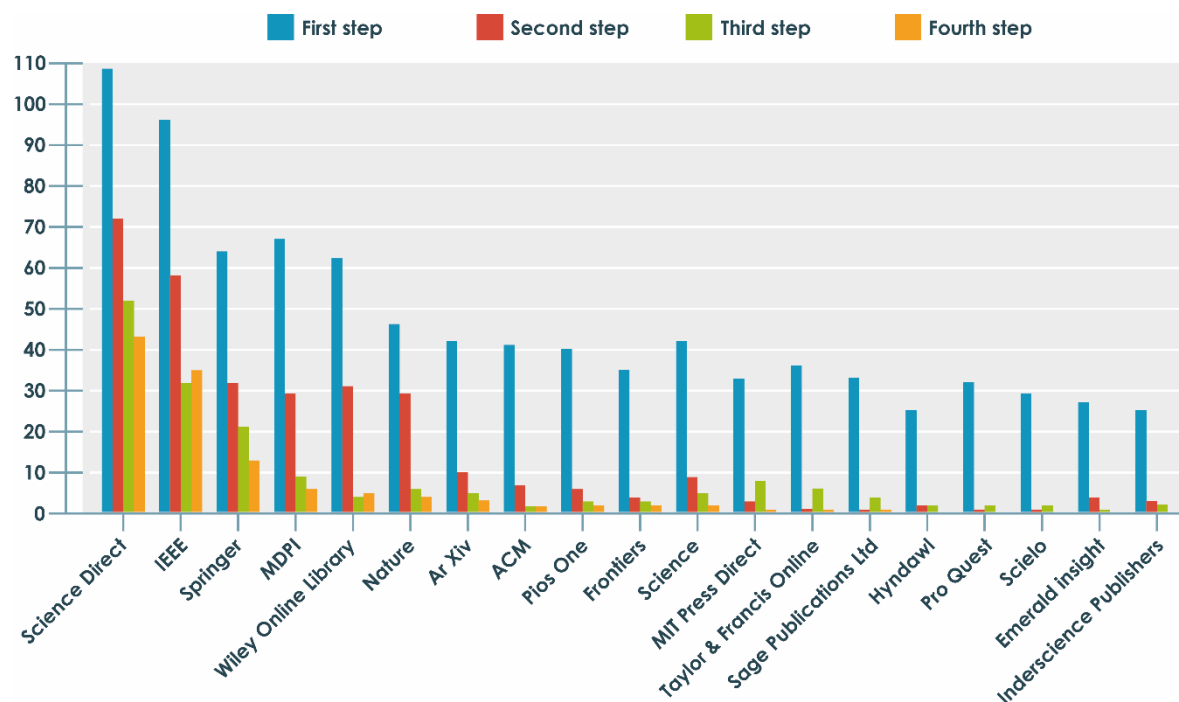

Figure S2. Number of articles identified.
